# Supplementary material for: Very low thermal conductivity in lanthanum phosphate–zirconia ceramic nanocomposites processed using a precipitation–peptization synthetic approach
Source: Royal Society of Chemistry journal article supplement (doi:10.1039/c5nj03290c), 2016-01-01
Supplement: c5nj03290c1.pdf [file c5nj03290c1.pdf]

## Supporting Information

### Very Low Thermal Conductivity in Lanthanum Phosphate-Zirconia Ceramic Nanocomposites Processed by a Precipitation-Peptization Synthetic Approach

Kottarathil Shijina<sup>a</sup>, Sasidharan Sankar<sup>a</sup>, Mohan Midhun<sup>a</sup>, Meerankhan Firozkhan<sup>a</sup>, Balagopal Narayanan Nair<sup>b</sup>, Krishna GopakumarWarrier<sup>a</sup> and Unnikrishnan Nair SaraswathyHareesh<sup>a\*</sup>

Corresponding Author: hareesh@niist.res.in

#### S1. Morphology of as precipitated and peptized $\text{LaPO}_4$

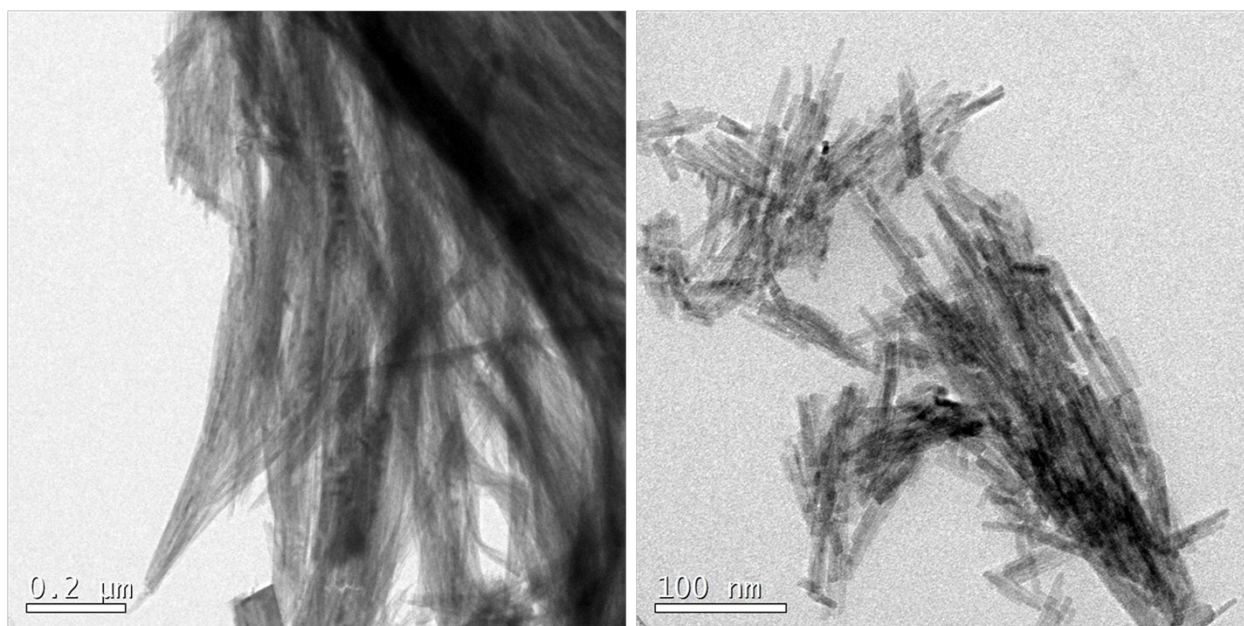

**Fig. S1** TEM images of as precipitated and peptized  $\text{LaPO}_4$ .

## S2. Morphology of calcined $\text{LaPO}_4$

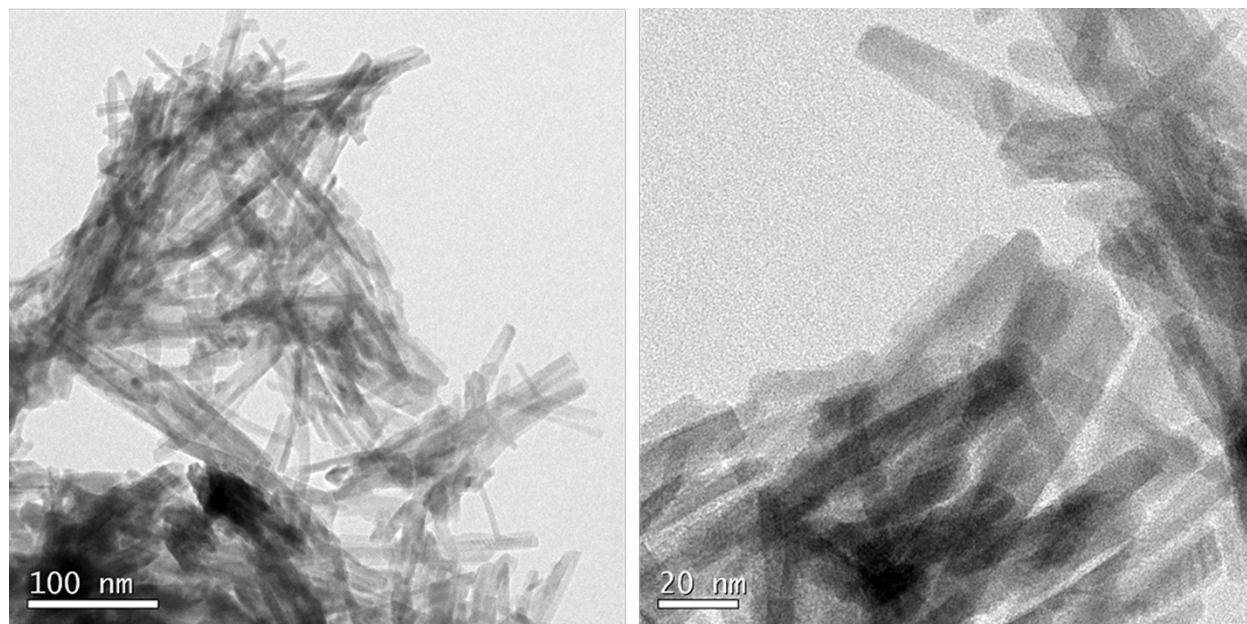

**Fig. S2** TEM images  $\text{LaPO}_4$  calcined at 800 °C.

### S3. Phase identification of $\text{LaPO}_4$ at various stages of processing

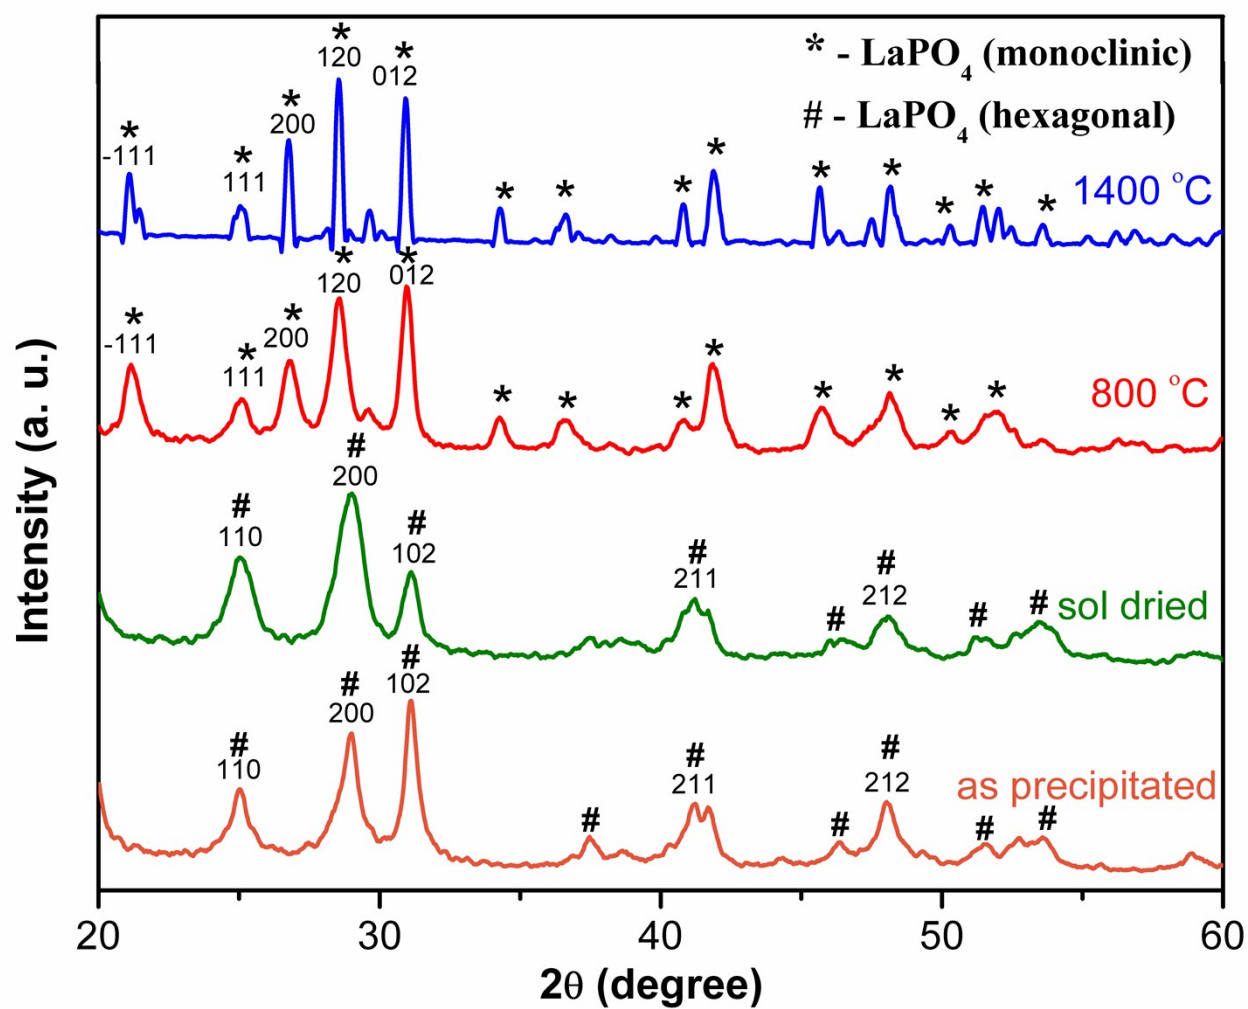

**Fig. S3** X-ray Diffraction pattern of  $\text{LaPO}_4$  as precipitated, as peptized, sol dried at 800 and 1400 °C.

#### S4. SEM analysis of sintered $\text{LaPO}_4$

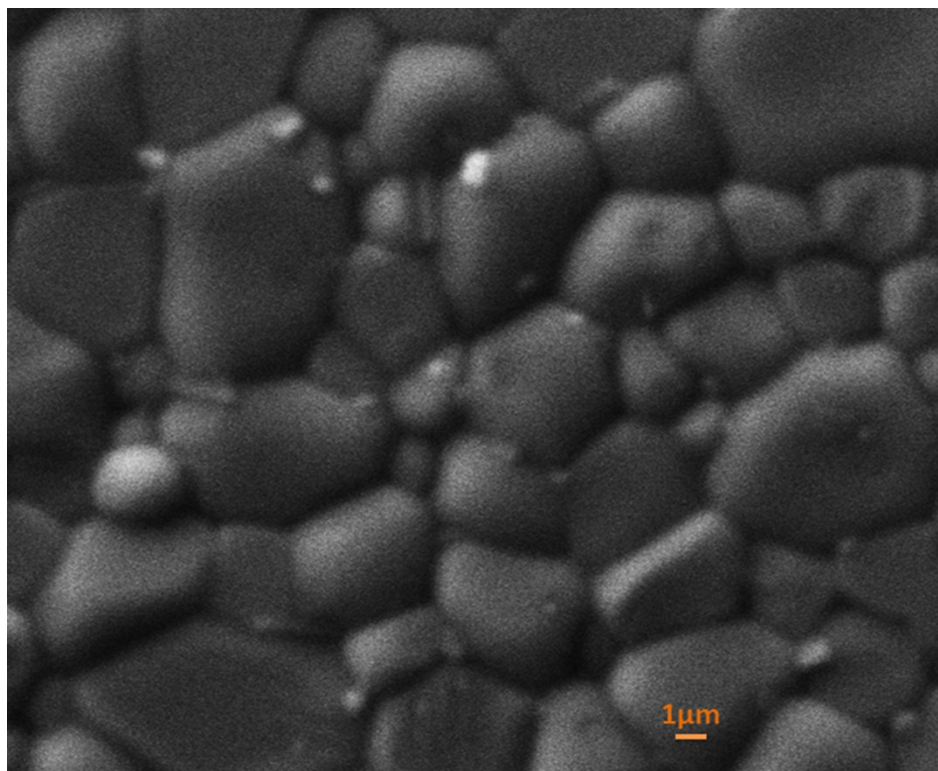

**Fig. S4** SEM image of the 1600 °C sintered and etched  $\text{LaPO}_4$  sample.
